# Supplementary material for: Integrated transcriptomic and proteomic analysis of the molecular cargo of extracellular vesicles derived from porcine adipose tissue-derived mesenchymal stem cells
Source: PubMed Central journal article supplement (PMC5363917; doi:10.1371/journal.pone.0174303), 2017-03-23
Supplement: pone.0174303.s001.pdf [file pone.0174303.s001.pdf]

*Table S1.* Sixteen transcription factors enriched in extracellular vesicles (EVs) that overlap with mRNA transcription factor targets of 4 miRNAs enriched in EVs.

| <b>Official gene symbol</b> | <b>Gene name</b>                                           |
|-----------------------------|------------------------------------------------------------|
| MLXIP                       | MLX Interacting Protein                                    |
| ELK4                        | ETS Transcription Factor                                   |
| NFAT5                       | Nuclear Factor Of Activated T-Cells 5, Tonicity-Responsive |
| REL                         | REL Proto-Oncogene, NF-KB Subunit                          |
| ZBTB37                      | Zinc Finger And BTB Domain Containing 37                   |
| IKZF2                       | IKAROS Family Zinc Finger 2                                |
| SP4                         | Sp4 Transcription Factor                                   |
| KLF7                        | Kruppel-Like Factor 7                                      |
| TRPS1                       | Transcriptional Repressor GATA Binding 1                   |
| FEM1C                       | Fem-1 Homolog C                                            |
| RUNX1T1                     | RUNX1 Translocation Partner 1                              |
| CCNT2                       | Cyclin T2                                                  |
| MDM2                        | MDM2 Proto-Oncogene                                        |
| MDM4                        | MDM4, P53 Regulator                                        |
| MAP3K2                      | Mitogen-Activated Protein Kinase Kinase Kinase 2           |
| STK17B                      | Serine/Threonine Kinase 17b                                |
