# Supplementary material for: Integrated transcriptomic and proteomic analysis of the molecular cargo of extracellular vesicles derived from porcine adipose tissue-derived mesenchymal stem cells
Source: PubMed Central journal article supplement (PMC5363917; doi:10.1371/journal.pone.0174303), 2017-03-23
Supplement: pone.0174303.s002.pdf [file pone.0174303.s002.pdf]

*Table S2.* Interactions between mRNA transcription factors (TFs) and miRNA TF target genes enriched in extracellular vesicles (EVs) using Search Tool for the Retrieval of Interacting Genes (STRING).

| Node 1  | Node 2  | Neighborhood on chromosome | Gene fusion | Phylogenetic co-occurrence | Homology | Co-expression | Experimentally determined interaction | Database annotated | Automated textmining | Combined score |
|---------|---------|----------------------------|-------------|----------------------------|----------|---------------|---------------------------------------|--------------------|----------------------|----------------|
| AFF1    | CCNT1   | 0                          | 0           | 0                          | 0        | 0             | 0.958                                 | 0                  | 0.351                | 0.971          |
| AFF1    | AFF4    | 0                          | 0           | 0                          | 0.667    | 0             | 0.68                                  | 0                  | 0.72                 | 0.755          |
| AFF1    | PAX5    | 0                          | 0           | 0                          | 0        | 0             | 0.566                                 | 0                  | 0.27                 | 0.669          |
| AFF1    | CDK6    | 0                          | 0           | 0                          | 0        | 0             | 0                                     | 0                  | 0.48                 | 0.48           |
| AFF4    | CCNT1   | 0                          | 0           | 0                          | 0        | 0             | 0.985                                 | 0                  | 0.899                | 0.998          |
| AFF4    | CCNT2   | 0                          | 0           | 0                          | 0        | 0             | 0.302                                 | 0                  | 0.33                 | 0.512          |
| ANKRD52 | CDK6    | 0                          | 0           | 0                          | 0        | 0             | 0.149                                 | 0                  | 0.37                 | 0.44           |
| ANKRD52 | STK17B  | 0                          | 0           | 0                          | 0        | 0             | 0.074                                 | 0                  | 0.417                | 0.437          |
| ANKS6   | CDK6    | 0                          | 0           | 0                          | 0        | 0             | 0.149                                 | 0                  | 0.37                 | 0.44           |
| ANKS6   | NEK9    | 0                          | 0           | 0                          | 0        | 0             | 0                                     | 0                  | 0.402                | 0.402          |
| ARID4B  | HELLS   | 0                          | 0           | 0                          | 0        | 0             | 0.101                                 | 0                  | 0.375                | 0.414          |
| ATF2    | MAPK1   | 0                          | 0           | 0                          | 0        | 0             | 0.861                                 | 0.9                | 0.567                | 0.993          |
| ATF2    | ESR1    | 0                          | 0           | 0                          | 0        | 0             | 0.074                                 | 0.9                | 0.328                | 0.932          |
| ATF2    | BMPR1A  | 0                          | 0           | 0                          | 0        | 0             | 0                                     | 0.9                | 0.073                | 0.903          |
| ATF6    | TP53    | 0                          | 0           | 0                          | 0        | 0             | 0                                     | 0                  | 0.458                | 0.457          |
| ATF6    | EIF2AK2 | 0                          | 0           | 0                          | 0        | 0             | 0                                     | 0                  | 0.436                | 0.436          |
| ATF6    | ATF2    | 0                          | 0           | 0                          | 0        | 0             | 0                                     | 0                  | 0.412                | 0.412          |
| ATF7    | MAPK1   | 0                          | 0           | 0                          | 0        | 0             | 0.299                                 | 0                  | 0.481                | 0.62           |
| ATF7    | ATF2    | 0                          | 0           | 0                          | 0.947    | 0             | 0.574                                 | 0                  | 0.642                | 0.588          |
| ATR     | TP53    | 0                          | 0           | 0                          | 0        | 0             | 0.998                                 | 0.9                | 0.583                | 0.999          |
| ATR     | RAD50   | 0                          | 0           | 0                          | 0        | 0.113         | 0.796                                 | 0                  | 0.827                | 0.966          |
| ATR     | DCLK1   | 0                          | 0           | 0                          | 0        | 0             | 0.587                                 | 0                  | 0.561                | 0.81           |
| ATR     | CDK6    | 0                          | 0           | 0                          | 0        | 0.065         | 0.357                                 | 0                  | 0.45                 | 0.64           |
| ATR     | SIRT2   | 0                          | 0           | 0                          | 0        | 0             | 0.234                                 | 0                  | 0.292                | 0.434          |
| BAZ2B   | CHRAC1  | 0                          | 0           | 0                          | 0        | 0             | 0.111                                 | 0                  | 0.399                | 0.443          |
| BAZ2B   | CHD1    | 0                          | 0           | 0                          | 0        | 0.077         | 0.202                                 | 0                  | 0.25                 | 0.4            |
| BCL11B  | CBX5    | 0                          | 0           | 0                          | 0        | 0             | 0.808                                 | 0                  | 0.117                | 0.823          |
| BCL11B  | FOXP1   | 0                          | 0           | 0                          | 0        | 0             | 0.102                                 | 0                  | 0.504                | 0.536          |
| BCL11B  | MYB     | 0                          | 0           | 0                          | 0        | 0             | 0.087                                 | 0                  | 0.41                 | 0.438          |
| BCLAF1  | CHD1    | 0                          | 0           | 0                          | 0        | 0             | 0.57                                  | 0                  | 0                    | 0.57           |
| BCLAF1  | CLK3    | 0                          | 0           | 0                          | 0        | 0             | 0.462                                 | 0                  | 0                    | 0.461          |
| BCLAF1  | MYB     | 0                          | 0           | 0                          | 0        | 0             | 0                                     | 0                  | 0.459                | 0.459          |
| BICD1   | NEK9    | 0                          | 0           | 0                          | 0        | 0             | 0                                     | 0                  | 0.56                 | 0.56           |
| BRCA1   | TP53    | 0                          | 0           | 0                          | 0        | 0             | 0.999                                 | 0.9                | 0.974                | 0.999          |
| BRCA1   | RAD50   | 0                          | 0           | 0                          | 0        | 0             | 0.984                                 | 0.9                | 0.813                | 0.999          |

|         |        |   |   |       |       |   |       |     |       |       |
|---------|--------|---|---|-------|-------|---|-------|-----|-------|-------|
| BRCA1   | ATR    | 0 | 0 | 0     | 0     | 0 | 0.992 | 0.9 | 0.582 | 0.999 |
| BRCA1   | ESR1   | 0 | 0 | 0     | 0     | 0 | 0.999 | 0.9 | 0.815 | 0.999 |
| BRCA1   | POU2F1 | 0 | 0 | 0     | 0     | 0 | 0.809 | 0.9 | 0.126 | 0.981 |
| BRCA1   | PGR    | 0 | 0 | 0     | 0     | 0 | 0.812 | 0   | 0.81  | 0.962 |
| BRCA1   | ATF2   | 0 | 0 | 0     | 0     | 0 | 0     | 0.9 | 0.186 | 0.915 |
| BRCA1   | CREB1  | 0 | 0 | 0     | 0     | 0 | 0.812 | 0   | 0.35  | 0.872 |
| BRCA1   | PIAS1  | 0 | 0 | 0     | 0     | 0 | 0.808 | 0   | 0.36  | 0.871 |
| BRCA1   | ZNF148 | 0 | 0 | 0     | 0     | 0 | 0     | 0   | 0.813 | 0.813 |
| BRCA1   | SMAD4  | 0 | 0 | 0     | 0     | 0 | 0.564 | 0   | 0.501 | 0.773 |
| BRCA1   | SMAD2  | 0 | 0 | 0     | 0     | 0 | 0.564 | 0   | 0.342 | 0.7   |
| BRCA1   | LDB2   | 0 | 0 | 0     | 0     | 0 | 0.571 | 0   | 0.313 | 0.692 |
| BRCA1   | KDM5B  | 0 | 0 | 0     | 0     | 0 | 0.551 | 0   | 0.26  | 0.653 |
| BRCA1   | MDM2   | 0 | 0 | 0     | 0     | 0 | 0.235 | 0   | 0.565 | 0.652 |
| BRCA1   | MAPK1  | 0 | 0 | 0     | 0     | 0 | 0.576 | 0   | 0.211 | 0.651 |
| BRCA1   | DAZAP1 | 0 | 0 | 0     | 0     | 0 | 0.566 | 0   | 0.192 | 0.634 |
| BRCA1   | ATF6   | 0 | 0 | 0     | 0     | 0 | 0.576 | 0   | 0.102 | 0.602 |
| BRCA1   | MED13  | 0 | 0 | 0     | 0     | 0 | 0.569 | 0   | 0.112 | 0.6   |
| BRCA1   | PEG3   | 0 | 0 | 0     | 0     | 0 | 0.566 | 0   | 0.061 | 0.575 |
| BRCA1   | ELK4   | 0 | 0 | 0     | 0     | 0 | 0.566 | 0   | 0.041 | 0.566 |
| BRCA1   | ESR2   | 0 | 0 | 0     | 0     | 0 | 0     | 0   | 0.5   | 0.499 |
| BRCA1   | MDM4   | 0 | 0 | 0     | 0     | 0 | 0     | 0   | 0.5   | 0.499 |
| BRCA1   | MAP3K1 | 0 | 0 | 0     | 0     | 0 | 0.053 | 0   | 0.417 | 0.424 |
| BRCA1   | CDK6   | 0 | 0 | 0     | 0     | 0 | 0     | 0   | 0.416 | 0.416 |
| BRCA1   | SIRT2  | 0 | 0 | 0     | 0     | 0 | 0.276 | 0   | 0.216 | 0.408 |
| BRCA1   | MYB    | 0 | 0 | 0     | 0     | 0 | 0     | 0   | 0.405 | 0.405 |
| CALM1   | DCLK1  | 0 | 0 | 0     | 0     | 0 | 0.111 | 0   | 0.62  | 0.648 |
| CALM1   | ESR2   | 0 | 0 | 0     | 0     | 0 | 0.567 | 0   | 0.199 | 0.638 |
| CALM1   | ESR1   | 0 | 0 | 0     | 0     | 0 | 0.567 | 0   | 0.2   | 0.638 |
| CALM1   | MYH3   | 0 | 0 | 0     | 0     | 0 | 0.211 | 0   | 0.514 | 0.6   |
| CALM1   | REL    | 0 | 0 | 0     | 0     | 0 | 0.576 | 0   | 0.072 | 0.589 |
| CALM1   | TCF4   | 0 | 0 | 0     | 0     | 0 | 0.529 | 0   | 0.054 | 0.535 |
| CALM1   | STK17B | 0 | 0 | 0     | 0     | 0 | 0.111 | 0   | 0.395 | 0.439 |
| CAMK1D  | CALM1  | 0 | 0 | 0     | 0     | 0 | 0.111 | 0.8 | 0.682 | 0.938 |
| CAMK1D  | MAPK1  | 0 | 0 | 0.206 | 0.671 | 0 | 0.25  | 0   | 0.489 | 0.401 |
| CASK    | CARD14 | 0 | 0 | 0     | 0     | 0 | 0     | 0   | 0.747 | 0.748 |
| CASK    | CALM1  | 0 | 0 | 0     | 0     | 0 | 0     | 0   | 0.506 | 0.506 |
| CASK    | GMEB1  | 0 | 0 | 0     | 0     | 0 | 0.455 | 0   | 0     | 0.455 |
| CCDC88A | MLXIP  | 0 | 0 | 0     | 0     | 0 | 0     | 0   | 0.504 | 0.504 |
| CCNT1   | ESR1   | 0 | 0 | 0     | 0     | 0 | 0.576 | 0   | 0.826 | 0.923 |
| CCNT2   | CCNT1  | 0 | 0 | 0     | 0.894 | 0 | 0     | 0.9 | 0.79  | 0.908 |
| CDK6    | CCNT1  | 0 | 0 | 0     | 0     | 0 | 0.298 | 0   | 0.439 | 0.589 |
| CDK6    | CCNT2  | 0 | 0 | 0     | 0     | 0 | 0.298 | 0   | 0.364 | 0.534 |
| CDK6    | ESR1   | 0 | 0 | 0     | 0     | 0 | 0     | 0   | 0.508 | 0.508 |
| CDK6    | ASB1   | 0 | 0 | 0     | 0     | 0 | 0.149 | 0   | 0.37  | 0.44  |

|       |         |   |   |   |       |       |       |     |       |       |
|-------|---------|---|---|---|-------|-------|-------|-----|-------|-------|
| CHD1  | ARID4B  | 0 | 0 | 0 | 0     | 0.071 | 0.213 | 0   | 0.51  | 0.61  |
| CHD1  | RBM28   | 0 | 0 | 0 | 0     | 0.281 | 0     | 0   | 0.205 | 0.404 |
| CHD2  | ARID4B  | 0 | 0 | 0 | 0     | 0     | 0.213 | 0   | 0.51  | 0.597 |
| CHD2  | RBM28   | 0 | 0 | 0 | 0     | 0.281 | 0     | 0   | 0.2   | 0.4   |
| CIITA | CCNT1   | 0 | 0 | 0 | 0     | 0     | 0     | 0   | 0.897 | 0.897 |
| CIITA | MAPK1   | 0 | 0 | 0 | 0     | 0     | 0.564 | 0   | 0.533 | 0.787 |
| CIITA | SMAD2   | 0 | 0 | 0 | 0     | 0     | 0     | 0   | 0.707 | 0.707 |
| CIITA | HDAC4   | 0 | 0 | 0 | 0     | 0     | 0.575 | 0   | 0.105 | 0.603 |
| CLK3  | TP53    | 0 | 0 | 0 | 0     | 0     | 0.462 | 0   | 0.047 | 0.465 |
| CREB1 | TP53    | 0 | 0 | 0 | 0     | 0     | 0.972 | 0   | 0.938 | 0.998 |
| CREB1 | RPS6KA3 | 0 | 0 | 0 | 0     | 0     | 0.566 | 0.9 | 0.977 | 0.998 |
| CREB1 | MAPK1   | 0 | 0 | 0 | 0     | 0     | 0     | 0.9 | 0.949 | 0.994 |
| CREB1 | CIITA   | 0 | 0 | 0 | 0     | 0     | 0     | 0.8 | 0.944 | 0.988 |
| CREB1 | ATF2    | 0 | 0 | 0 | 0     | 0     | 0.083 | 0.9 | 0.884 | 0.988 |
| CREB1 | RPS6KA6 | 0 | 0 | 0 | 0     | 0     | 0     | 0.9 | 0.668 | 0.965 |
| CREB1 | MAP3K1  | 0 | 0 | 0 | 0     | 0     | 0     | 0.9 | 0.185 | 0.915 |
| CREB1 | ATF7    | 0 | 0 | 0 | 0     | 0     | 0.659 | 0   | 0.727 | 0.903 |
| CREB1 | PRKCB   | 0 | 0 | 0 | 0     | 0     | 0     | 0.8 | 0.179 | 0.828 |
| CREB1 | HIPK2   | 0 | 0 | 0 | 0     | 0     | 0     | 0   | 0.821 | 0.821 |
| CREB1 | SMAD2   | 0 | 0 | 0 | 0     | 0     | 0     | 0   | 0.775 | 0.776 |
| CREB1 | REL     | 0 | 0 | 0 | 0     | 0     | 0     | 0   | 0.776 | 0.776 |
| CREB1 | MYB     | 0 | 0 | 0 | 0     | 0     | 0     | 0   | 0.766 | 0.766 |
| CREB1 | DR1     | 0 | 0 | 0 | 0     | 0.067 | 0.644 | 0   | 0.304 | 0.749 |
| CREB1 | POU2F1  | 0 | 0 | 0 | 0     | 0     | 0.576 | 0   | 0.347 | 0.711 |
| CREB1 | ESR1    | 0 | 0 | 0 | 0     | 0     | 0     | 0   | 0.666 | 0.666 |
| CREB1 | SMAD4   | 0 | 0 | 0 | 0     | 0     | 0     | 0   | 0.622 | 0.622 |
| CREB1 | ATR     | 0 | 0 | 0 | 0     | 0     | 0.566 | 0   | 0.156 | 0.618 |
| CREB1 | PPARA   | 0 | 0 | 0 | 0     | 0     | 0     | 0   | 0.61  | 0.61  |
| CREB1 | ATF6    | 0 | 0 | 0 | 0     | 0     | 0.198 | 0   | 0.505 | 0.586 |
| CREB1 | PTCH1   | 0 | 0 | 0 | 0     | 0     | 0     | 0   | 0.583 | 0.583 |
| CREB1 | PGR     | 0 | 0 | 0 | 0     | 0     | 0     | 0   | 0.536 | 0.536 |
| CREB1 | STK32A  | 0 | 0 | 0 | 0     | 0     | 0     | 0   | 0.534 | 0.534 |
| CREB1 | CAMK1D  | 0 | 0 | 0 | 0     | 0     | 0.105 | 0   | 0.492 | 0.526 |
| CREB1 | PRKAA2  | 0 | 0 | 0 | 0     | 0     | 0     | 0   | 0.496 | 0.496 |
| CREB1 | CDK6    | 0 | 0 | 0 | 0     | 0     | 0     | 0   | 0.489 | 0.489 |
| CREB1 | DCLK1   | 0 | 0 | 0 | 0     | 0     | 0     | 0   | 0.477 | 0.477 |
| CREB1 | PDPK1   | 0 | 0 | 0 | 0     | 0     | 0     | 0   | 0.444 | 0.444 |
| CREB1 | RFX3    | 0 | 0 | 0 | 0     | 0     | 0.385 | 0   | 0.133 | 0.444 |
| CREB1 | RUNX2   | 0 | 0 | 0 | 0     | 0     | 0     | 0   | 0.429 | 0.429 |
| CREB1 | PIAS1   | 0 | 0 | 0 | 0     | 0     | 0.272 | 0   | 0.248 | 0.429 |
| CREB1 | LHX9    | 0 | 0 | 0 | 0     | 0     | 0     | 0   | 0.405 | 0.405 |
| CUX1  | BCL11B  | 0 | 0 | 0 | 0     | 0     | 0.082 | 0   | 0.611 | 0.628 |
| CUX1  | FOXP1   | 0 | 0 | 0 | 0     | 0     | 0     | 0   | 0.412 | 0.412 |
| DCLK1 | MAPK1   | 0 | 0 | 0 | 0.682 | 0.091 | 0.25  | 0   | 0.593 | 0.419 |

|        |         |   |   |      |       |       |       |     |       |       |
|--------|---------|---|---|------|-------|-------|-------|-----|-------|-------|
| DDX52  | RBM28   | 0 | 0 | 0    | 0     | 0.841 | 0     | 0   | 0.349 | 0.892 |
| DDX52  | WDR12   | 0 | 0 | 0    | 0     | 0.89  | 0     | 0   | 0.046 | 0.89  |
| DR1    | PPARA   | 0 | 0 | 0    | 0     | 0     | 0     | 0   | 0.661 | 0.661 |
| DYRK2  | TP53    | 0 | 0 | 0    | 0     | 0     | 0     | 0.9 | 0.85  | 0.984 |
| ELK4   | MAPK1   | 0 | 0 | 0    | 0     | 0     | 0.102 | 0.8 | 0.276 | 0.858 |
| ELK4   | RNF41   | 0 | 0 | 0    | 0     | 0     | 0     | 0   | 0.549 | 0.549 |
| ESR2   | ESR1    | 0 | 0 | 0    | 0.935 | 0     | 0.988 | 0.9 | 0.981 | 0.998 |
| ESR2   | MAPK1   | 0 | 0 | 0    | 0     | 0     | 0.601 | 0.8 | 0.259 | 0.935 |
| ESR2   | PGR     | 0 | 0 | 0    | 0.72  | 0     | 0     | 0.9 | 0.813 | 0.922 |
| ESR2   | PPARA   | 0 | 0 | 0    | 0.642 | 0     | 0     | 0.9 | 0.417 | 0.914 |
| ESR2   | NR1D2   | 0 | 0 | 0    | 0.633 | 0     | 0     | 0.9 | 0.362 | 0.912 |
| ESR2   | NR2C2   | 0 | 0 | 0    | 0.64  | 0     | 0     | 0.9 | 0.129 | 0.903 |
| ESR2   | TRIM24  | 0 | 0 | 0    | 0     | 0     | 0.793 | 0   | 0.094 | 0.805 |
| ESR2   | NRIP1   | 0 | 0 | 0    | 0     | 0     | 0.546 | 0   | 0.393 | 0.713 |
| ESR2   | SMAD4   | 0 | 0 | 0    | 0     | 0     | 0.567 | 0   | 0.195 | 0.636 |
| ESR2   | SMAD2   | 0 | 0 | 0    | 0     | 0     | 0.567 | 0   | 0.138 | 0.61  |
| ESR2   | TP53    | 0 | 0 | 0    | 0     | 0     | 0     | 0   | 0.58  | 0.58  |
| ESR2   | MYB     | 0 | 0 | 0    | 0     | 0     | 0     | 0   | 0.455 | 0.455 |
| ETV1   | RPS6KA3 | 0 | 0 | 0    | 0     | 0     | 0     | 0   | 0.824 | 0.824 |
| ETV1   | PPARA   | 0 | 0 | 0    | 0     | 0     | 0     | 0   | 0.8   | 0.8   |
| ETV1   | PAX7    | 0 | 0 | 0    | 0     | 0     | 0     | 0   | 0.468 | 0.468 |
| FBXW2  | MYB     | 0 | 0 | 0    | 0     | 0     | 0.573 | 0   | 0     | 0.573 |
| FBXW2  | WDR12   | 0 | 0 | 0.44 | 0     | 0     | 0     | 0   | 0     | 0.44  |
| FBXW2  | CAMTA1  | 0 | 0 | 0    | 0     | 0     | 0     | 0   | 0.411 | 0.411 |
| FOXN2  | PRRX1   | 0 | 0 | 0    | 0     | 0     | 0.086 | 0   | 0.373 | 0.402 |
| G3BP1  | PDPK1   | 0 | 0 | 0    | 0     | 0     | 0.92  | 0   | 0     | 0.92  |
| G3BP1  | TP53    | 0 | 0 | 0    | 0     | 0     | 0.564 | 0   | 0.18  | 0.627 |
| G3BP1  | DAZAP1  | 0 | 0 | 0    | 0     | 0.423 | 0     | 0   | 0.132 | 0.478 |
| GCC2   | TRIP11  | 0 | 0 | 0    | 0     | 0.076 | 0     | 0   | 0.506 | 0.524 |
| GMEB1  | CBFA2T2 | 0 | 0 | 0    | 0     | 0     | 0     | 0   | 0.486 | 0.485 |
| GOLGA1 | GCC2    | 0 | 0 | 0    | 0     | 0     | 0     | 0   | 0.725 | 0.725 |
| GOLGA1 | GOLGA4  | 0 | 0 | 0    | 0     | 0     | 0     | 0   | 0.725 | 0.725 |
| GOLGA1 | EEA1    | 0 | 0 | 0    | 0     | 0     | 0     | 0   | 0.478 | 0.478 |
| GOLGA4 | GCC2    | 0 | 0 | 0    | 0     | 0.063 | 0     | 0   | 0.771 | 0.776 |
| GOLGA4 | TRIP11  | 0 | 0 | 0    | 0     | 0.114 | 0     | 0   | 0.628 | 0.656 |
| GOLGA4 | EEA1    | 0 | 0 | 0    | 0     | 0.128 | 0     | 0   | 0.361 | 0.418 |
| HDAC2  | TP53    | 0 | 0 | 0    | 0     | 0     | 0.999 | 0   | 0.582 | 0.999 |
| HDAC2  | ARID4B  | 0 | 0 | 0    | 0     | 0     | 0.95  | 0.9 | 0.9   | 0.999 |
| HDAC2  | ZNF217  | 0 | 0 | 0    | 0     | 0     | 0.93  | 0.9 | 0.437 | 0.995 |
| HDAC2  | MXD1    | 0 | 0 | 0    | 0     | 0     | 0.849 | 0.9 | 0.138 | 0.985 |
| HDAC2  | BCL11B  | 0 | 0 | 0    | 0     | 0     | 0.931 | 0   | 0.389 | 0.956 |
| HDAC2  | ZMYM2   | 0 | 0 | 0    | 0     | 0     | 0.932 | 0   | 0.342 | 0.953 |
| HDAC2  | SMAD2   | 0 | 0 | 0    | 0     | 0     | 0.304 | 0.9 | 0.335 | 0.949 |
| HDAC2  | MDM2    | 0 | 0 | 0    | 0     | 0     | 0.422 | 0.9 | 0.197 | 0.949 |

|         |         |       |   |   |       |       |       |      |       |       |
|---------|---------|-------|---|---|-------|-------|-------|------|-------|-------|
| HDAC2   | SMAD4   | 0     | 0 | 0 | 0     | 0     | 0.249 | 0.9  | 0.349 | 0.946 |
| HDAC2   | CREB1   | 0     | 0 | 0 | 0     | 0     | 0.812 | 0    | 0.714 | 0.944 |
| HDAC2   | CIITA   | 0     | 0 | 0 | 0     | 0     | 0.917 | 0    | 0.341 | 0.943 |
| HDAC2   | BRCA1   | 0     | 0 | 0 | 0     | 0     | 0.847 | 0    | 0.398 | 0.904 |
| HDAC2   | PCGF5   | 0     | 0 | 0 | 0     | 0     | 0     | 0.9  | 0.064 | 0.902 |
| HDAC2   | HELLS   | 0     | 0 | 0 | 0     | 0.1   | 0.832 | 0    | 0.389 | 0.9   |
| HDAC2   | HDAC4   | 0     | 0 | 0 | 0.657 | 0     | 0.458 | 0.72 | 0.928 | 0.891 |
| HDAC2   | WHSC1   | 0.063 | 0 | 0 | 0     | 0     | 0.843 | 0    | 0.286 | 0.886 |
| HDAC2   | CHD1    | 0     | 0 | 0 | 0     | 0.078 | 0.302 | 0    | 0.798 | 0.859 |
| HDAC2   | KDM5B   | 0     | 0 | 0 | 0     | 0     | 0.653 | 0    | 0.513 | 0.824 |
| HDAC2   | NRIP1   | 0     | 0 | 0 | 0     | 0     | 0.566 | 0.36 | 0.325 | 0.796 |
| HDAC2   | CHD2    | 0     | 0 | 0 | 0     | 0.078 | 0.302 | 0    | 0.699 | 0.789 |
| HDAC2   | ESR1    | 0     | 0 | 0 | 0     | 0     | 0.574 | 0    | 0.5   | 0.777 |
| HDAC2   | ATR     | 0     | 0 | 0 | 0     | 0     | 0.662 | 0    | 0.344 | 0.769 |
| HDAC2   | SIRT2   | 0     | 0 | 0 | 0     | 0     | 0.276 | 0    | 0.694 | 0.769 |
| HDAC2   | TRIM24  | 0     | 0 | 0 | 0     | 0     | 0.653 | 0    | 0.348 | 0.764 |
| HDAC2   | KDM5A   | 0     | 0 | 0 | 0     | 0     | 0.475 | 0    | 0.529 | 0.743 |
| HDAC2   | ZFPM2   | 0     | 0 | 0 | 0     | 0     | 0.618 | 0    | 0.236 | 0.696 |
| HDAC2   | ZNF827  | 0     | 0 | 0 | 0     | 0     | 0.619 | 0    | 0.181 | 0.674 |
| HDAC2   | RUNX1T1 | 0     | 0 | 0 | 0     | 0     | 0.573 | 0    | 0.244 | 0.663 |
| HDAC2   | CBX5    | 0     | 0 | 0 | 0     | 0.096 | 0     | 0.54 | 0.253 | 0.662 |
| HDAC2   | MECP2   | 0     | 0 | 0 | 0     | 0     | 0     | 0    | 0.63  | 0.63  |
| HDAC2   | IKZF2   | 0     | 0 | 0 | 0     | 0     | 0.557 | 0    | 0.181 | 0.621 |
| HDAC2   | PIAS1   | 0     | 0 | 0 | 0     | 0.072 | 0.317 | 0    | 0.403 | 0.589 |
| HDAC2   | MAPK1   | 0     | 0 | 0 | 0     | 0     | 0.149 | 0    | 0.449 | 0.511 |
| HDAC2   | KDM3A   | 0     | 0 | 0 | 0     | 0     | 0.276 | 0    | 0.289 | 0.463 |
| HDAC2   | MYB     | 0     | 0 | 0 | 0     | 0     | 0.101 | 0    | 0.424 | 0.46  |
| HDAC2   | ATF2    | 0     | 0 | 0 | 0     | 0     | 0.149 | 0    | 0.351 | 0.424 |
| HDAC2   | MIER3   | 0     | 0 | 0 | 0     | 0     | 0.413 | 0    | 0     | 0.413 |
| HDAC4   | ESR1    | 0     | 0 | 0 | 0     | 0     | 0.812 | 0.9  | 0.281 | 0.985 |
| HDAC4   | CBX5    | 0     | 0 | 0 | 0     | 0     | 0.57  | 0.54 | 0.071 | 0.8   |
| HDAC4   | SIRT2   | 0     | 0 | 0 | 0     | 0     | 0.276 | 0    | 0.649 | 0.735 |
| HDAC4   | ATF2    | 0     | 0 | 0 | 0     | 0     | 0.623 | 0    | 0.178 | 0.677 |
| HDAC4   | MAPK1   | 0     | 0 | 0 | 0     | 0     | 0.6   | 0    | 0.184 | 0.66  |
| HIPK2   | TP53    | 0     | 0 | 0 | 0     | 0     | 0.998 | 0.9  | 0.952 | 0.999 |
| HIPK2   | MYB     | 0     | 0 | 0 | 0     | 0     | 0.805 | 0    | 0.888 | 0.977 |
| HIPK2   | SMAD2   | 0     | 0 | 0 | 0     | 0     | 0.571 | 0    | 0.718 | 0.874 |
| HIPK2   | MAP3K1  | 0     | 0 | 0 | 0.609 | 0     | 0.667 | 0    | 0.16  | 0.684 |
| HIPK2   | PTCH1   | 0     | 0 | 0 | 0     | 0     | 0.571 | 0    | 0.047 | 0.573 |
| HIPK2   | ZNF217  | 0     | 0 | 0 | 0     | 0.096 | 0.102 | 0    | 0.4   | 0.47  |
| HIPK2   | MDM4    | 0     | 0 | 0 | 0     | 0     | 0     | 0    | 0.436 | 0.436 |
| HNRNPA0 | SF3B3   | 0     | 0 | 0 | 0     | 0     | 0     | 0.9  | 0.092 | 0.905 |
| HOOK1   | HOOK3   | 0     | 0 | 0 | 0.959 | 0     | 0.556 | 0.9  | 0.862 | 0.955 |
| HOOK1   | CCDC88A | 0     | 0 | 0 | 0     | 0     | 0     | 0    | 0.609 | 0.609 |

|        |         |   |   |   |       |       |       |     |       |       |
|--------|---------|---|---|---|-------|-------|-------|-----|-------|-------|
| HOOK1  | ZNF250  | 0 | 0 | 0 | 0     | 0     | 0.434 | 0   | 0     | 0.434 |
| IKBKB  | PRKCB   | 0 | 0 | 0 | 0.624 | 0     | 0.919 | 0.9 | 0.257 | 0.992 |
| IKBKB  | MAP3K1  | 0 | 0 | 0 | 0.621 | 0     | 0.916 | 0.9 | 0.256 | 0.991 |
| IKBKB  | NR2C2   | 0 | 0 | 0 | 0     | 0     | 0.576 | 0   | 0.838 | 0.928 |
| IKBKB  | PDPK1   | 0 | 0 | 0 | 0.639 | 0     | 0     | 0.9 | 0.212 | 0.906 |
| IKBKB  | CCNT1   | 0 | 0 | 0 | 0     | 0     | 0     | 0.9 | 0.072 | 0.903 |
| IKBKB  | TP53    | 0 | 0 | 0 | 0     | 0     | 0.807 | 0   | 0.502 | 0.899 |
| IKBKB  | REL     | 0 | 0 | 0 | 0     | 0     | 0     | 0   | 0.722 | 0.722 |
| IKBKB  | EIF2AK2 | 0 | 0 | 0 | 0.631 | 0     | 0.564 | 0   | 0.068 | 0.568 |
| IKBKB  | CALM1   | 0 | 0 | 0 | 0     | 0     | 0.352 | 0   | 0.197 | 0.457 |
| IKZF2  | HDAC4   | 0 | 0 | 0 | 0     | 0     | 0.603 | 0   | 0.199 | 0.668 |
| IRF4   | CIITA   | 0 | 0 | 0 | 0     | 0     | 0     | 0.9 | 0.472 | 0.944 |
| IRF4   | ATF2    | 0 | 0 | 0 | 0     | 0     | 0     | 0.9 | 0.047 | 0.9   |
| IRF4   | REL     | 0 | 0 | 0 | 0     | 0     | 0     | 0   | 0.897 | 0.897 |
| IRF4   | PAX5    | 0 | 0 | 0 | 0     | 0     | 0     | 0   | 0.722 | 0.722 |
| IRF4   | FOXP1   | 0 | 0 | 0 | 0     | 0     | 0.1   | 0   | 0.47  | 0.502 |
| JMJD1C | ESR2    | 0 | 0 | 0 | 0     | 0     | 0.484 | 0   | 0     | 0.483 |
| JMJD1C | ANKRD12 | 0 | 0 | 0 | 0     | 0.078 | 0     | 0   | 0.432 | 0.454 |
| JMJD1C | ZMYM2   | 0 | 0 | 0 | 0     | 0     | 0     | 0   | 0.409 | 0.41  |
| JMY    | TP53    | 0 | 0 | 0 | 0     | 0     | 0.576 | 0   | 0.389 | 0.729 |
| KDM3A  | PPARA   | 0 | 0 | 0 | 0     | 0     | 0     | 0   | 0.609 | 0.609 |
| KDM5A  | RUNX2   | 0 | 0 | 0 | 0     | 0     | 0     | 0   | 0.821 | 0.821 |
| KDM5A  | PGR     | 0 | 0 | 0 | 0     | 0     | 0     | 0   | 0.81  | 0.81  |
| KDM5A  | ESR1    | 0 | 0 | 0 | 0     | 0     | 0.57  | 0   | 0.126 | 0.608 |
| KDM5A  | MXD1    | 0 | 0 | 0 | 0     | 0     | 0.576 | 0   | 0     | 0.576 |
| KDM5A  | NR2C2   | 0 | 0 | 0 | 0     | 0     | 0.57  | 0   | 0.043 | 0.57  |
| KDM5A  | ARID4B  | 0 | 0 | 0 | 0     | 0     | 0.087 | 0   | 0.533 | 0.555 |
| KDM5A  | KDM3A   | 0 | 0 | 0 | 0     | 0     | 0     | 0   | 0.547 | 0.547 |
| KDM5B  | HDAC4   | 0 | 0 | 0 | 0     | 0     | 0.666 | 0   | 0.219 | 0.728 |
| KDM5B  | ZNF217  | 0 | 0 | 0 | 0     | 0     | 0.569 | 0   | 0.3   | 0.685 |
| KDM5B  | KDM3A   | 0 | 0 | 0 | 0     | 0     | 0     | 0   | 0.613 | 0.613 |
| KDM5B  | ONECUT2 | 0 | 0 | 0 | 0     | 0.101 | 0.443 | 0   | 0.057 | 0.486 |
| LCOR   | ESR1    | 0 | 0 | 0 | 0     | 0     | 0.57  | 0.9 | 0.346 | 0.969 |
| LCOR   | NRIP1   | 0 | 0 | 0 | 0     | 0     | 0     | 0   | 0.646 | 0.646 |
| LCOR   | HDAC4   | 0 | 0 | 0 | 0     | 0     | 0.57  | 0   | 0.126 | 0.608 |
| LHX9   | LDB2    | 0 | 0 | 0 | 0     | 0     | 0.878 | 0   | 0.856 | 0.981 |
| LHX9   | VSX2    | 0 | 0 | 0 | 0     | 0     | 0     | 0   | 0.777 | 0.777 |
| LHX9   | PTCH1   | 0 | 0 | 0 | 0     | 0     | 0     | 0   | 0.459 | 0.459 |
| LHX9   | FOXN2   | 0 | 0 | 0 | 0     | 0     | 0.086 | 0   | 0.373 | 0.402 |
| LPP    | MAPK1   | 0 | 0 | 0 | 0     | 0     | 0     | 0   | 0.616 | 0.616 |
| LPP    | RPS6KA6 | 0 | 0 | 0 | 0     | 0     | 0     | 0   | 0.47  | 0.47  |
| MAP3K1 | MAPK1   | 0 | 0 | 0 | 0.665 | 0     | 0.945 | 0   | 0.692 | 0.958 |
| MAP3K1 | PAK2    | 0 | 0 | 0 | 0.697 | 0     | 0.362 | 0.9 | 0.271 | 0.938 |
| MAP3K1 | SMAD2   | 0 | 0 | 0 | 0     | 0     | 0     | 0.9 | 0.186 | 0.915 |

|        |         |       |   |   |       |       |       |     |       |       |
|--------|---------|-------|---|---|-------|-------|-------|-----|-------|-------|
| MAP3K1 | ESR1    | 0     | 0 | 0 | 0     | 0     | 0.567 | 0   | 0.348 | 0.705 |
| MAP3K1 | TP53    | 0     | 0 | 0 | 0     | 0     | 0.576 | 0   | 0.33  | 0.703 |
| MAP3K1 | MAP3K2  | 0     | 0 | 0 | 0.729 | 0     | 0.583 | 0   | 0.64  | 0.653 |
| MAP3K1 | DTX1    | 0     | 0 | 0 | 0     | 0     | 0.576 | 0   | 0     | 0.576 |
| MAP3K1 | PRKCB   | 0     | 0 | 0 | 0.628 | 0     | 0.397 | 0   | 0.771 | 0.568 |
| MAP3K1 | MIER3   | 0     | 0 | 0 | 0     | 0     | 0     | 0   | 0.502 | 0.502 |
| MAP3K2 | PAK2    | 0     | 0 | 0 | 0.704 | 0     | 0.447 | 0.8 | 0.687 | 0.907 |
| MAP3K2 | MAPK1   | 0     | 0 | 0 | 0.675 | 0     | 0.327 | 0   | 0.752 | 0.489 |
| MAP3K9 | CARD14  | 0.462 | 0 | 0 | 0     | 0     | 0.077 | 0   | 0.166 | 0.549 |
| MAP3K9 | CASK    | 0.462 | 0 | 0 | 0.615 | 0     | 0.077 | 0   | 0.166 | 0.508 |
| MAPK1  | ESR1    | 0     | 0 | 0 | 0     | 0     | 0.919 | 0.9 | 0.344 | 0.994 |
| MARK1  | HDAC4   | 0     | 0 | 0 | 0     | 0     | 0.331 | 0   | 0.617 | 0.733 |
| MARK1  | TAOK1   | 0     | 0 | 0 | 0.624 | 0     | 0.576 | 0   | 0.583 | 0.666 |
| MARK1  | ZC3H14  | 0     | 0 | 0 | 0     | 0     | 0.071 | 0   | 0.653 | 0.663 |
| MDM2   | TP53    | 0     | 0 | 0 | 0     | 0.167 | 0.999 | 0.9 | 0.981 | 0.999 |
| MDM2   | MDM4    | 0     | 0 | 0 | 0.786 | 0     | 0.999 | 0.9 | 0.856 | 0.999 |
| MDM2   | ESR1    | 0     | 0 | 0 | 0     | 0     | 0.962 | 0   | 0.472 | 0.979 |
| MDM2   | PIAS1   | 0     | 0 | 0 | 0     | 0     | 0.564 | 0.9 | 0.163 | 0.96  |
| MDM2   | HIPK2   | 0     | 0 | 0 | 0     | 0     | 0.912 | 0   | 0.5   | 0.954 |
| MDM2   | PDPK1   | 0     | 0 | 0 | 0     | 0     | 0     | 0.9 | 0.243 | 0.921 |
| MDM2   | ATR     | 0     | 0 | 0 | 0     | 0     | 0     | 0.9 | 0.16  | 0.912 |
| MDM2   | RAD50   | 0     | 0 | 0 | 0     | 0     | 0.665 | 0   | 0.286 | 0.75  |
| MDM2   | JMY     | 0     | 0 | 0 | 0     | 0     | 0.576 | 0   | 0.359 | 0.716 |
| MDM2   | DYRK2   | 0     | 0 | 0 | 0     | 0     | 0.566 | 0   | 0.242 | 0.656 |
| MDM2   | ESR2    | 0     | 0 | 0 | 0     | 0     | 0.576 | 0   | 0.21  | 0.65  |
| MDM2   | CDK6    | 0     | 0 | 0 | 0     | 0     | 0     | 0   | 0.502 | 0.502 |
| MDM4   | TP53    | 0     | 0 | 0 | 0     | 0     | 0.999 | 0.8 | 0.949 | 0.999 |
| MDM4   | SMAD4   | 0     | 0 | 0 | 0     | 0     | 0.564 | 0   | 0.824 | 0.92  |
| MECP2  | CDKL5   | 0     | 0 | 0 | 0     | 0     | 0     | 0   | 0.704 | 0.704 |
| MED13  | PPARA   | 0     | 0 | 0 | 0     | 0     | 0     | 0.9 | 0.103 | 0.906 |
| MED13  | ESR1    | 0     | 0 | 0 | 0     | 0     | 0.571 | 0   | 0.101 | 0.597 |
| MYB    | CDK6    | 0     | 0 | 0 | 0     | 0     | 0.15  | 0.9 | 0.95  | 0.995 |
| MYB    | TP53    | 0     | 0 | 0 | 0     | 0     | 0     | 0.9 | 0.937 | 0.993 |
| MYB    | ESR1    | 0     | 0 | 0 | 0     | 0     | 0     | 0   | 0.912 | 0.912 |
| MYB    | NRIP1   | 0     | 0 | 0 | 0     | 0     | 0     | 0   | 0.846 | 0.846 |
| MYB    | PIAS1   | 0     | 0 | 0 | 0     | 0.074 | 0.576 | 0   | 0.315 | 0.707 |
| MYB    | MAPK1   | 0     | 0 | 0 | 0     | 0     | 0.603 | 0   | 0.263 | 0.695 |
| MYB    | ZFH3    | 0     | 0 | 0 | 0     | 0     | 0.576 | 0   | 0.249 | 0.668 |
| MYB    | ATF2    | 0     | 0 | 0 | 0     | 0     | 0.11  | 0   | 0.55  | 0.582 |
| MYB    | REL     | 0     | 0 | 0 | 0     | 0     | 0     | 0   | 0.518 | 0.518 |
| MYB    | SF3B3   | 0     | 0 | 0 | 0     | 0.077 | 0.448 | 0   | 0     | 0.468 |
| MYB    | RPS6KA6 | 0     | 0 | 0 | 0     | 0     | 0     | 0   | 0.468 | 0.468 |
| MYB    | ATF7    | 0     | 0 | 0 | 0     | 0     | 0.11  | 0   | 0.389 | 0.433 |
| MYB    | PGR     | 0     | 0 | 0 | 0     | 0     | 0     | 0   | 0.407 | 0.407 |

|        |         |   |   |       |       |       |       |      |       |       |
|--------|---------|---|---|-------|-------|-------|-------|------|-------|-------|
| MYBL1  | PITX3   | 0 | 0 | 0     | 0     | 0     | 0.575 | 0    | 0.737 | 0.883 |
| MYBL1  | CDK6    | 0 | 0 | 0     | 0     | 0     | 0.15  | 0    | 0.641 | 0.682 |
| MYBL1  | HIPK2   | 0 | 0 | 0     | 0     | 0     | 0.571 | 0    | 0.243 | 0.661 |
| MYBL1  | CREB1   | 0 | 0 | 0     | 0     | 0     | 0     | 0    | 0.525 | 0.525 |
| MYBL1  | RFX3    | 0 | 0 | 0     | 0     | 0     | 0.245 | 0    | 0.328 | 0.471 |
| MYBL1  | RPS6KA6 | 0 | 0 | 0     | 0     | 0     | 0     | 0    | 0.468 | 0.468 |
| MYBL1  | RPS6KA3 | 0 | 0 | 0     | 0     | 0     | 0     | 0    | 0.468 | 0.468 |
| MYBL1  | SF3B3   | 0 | 0 | 0     | 0     | 0.077 | 0.448 | 0    | 0     | 0.468 |
| MYBL1  | ATF2    | 0 | 0 | 0     | 0     | 0     | 0.11  | 0    | 0.356 | 0.402 |
| MYBL1  | ATF7    | 0 | 0 | 0     | 0     | 0     | 0.11  | 0    | 0.356 | 0.402 |
| MYEF2  | NOVA2   | 0 | 0 | 0     | 0     | 0     | 0.2   | 0    | 0.704 | 0.753 |
| MYSM1  | HELLS   | 0 | 0 | 0     | 0     | 0.109 | 0.724 | 0    | 0.73  | 0.928 |
| MYSM1  | ARID4B  | 0 | 0 | 0     | 0     | 0     | 0.363 | 0    | 0.584 | 0.723 |
| MYSM1  | MYB     | 0 | 0 | 0     | 0     | 0     | 0.078 | 0    | 0.477 | 0.497 |
| MYSM1  | HOOK1   | 0 | 0 | 0     | 0     | 0     | 0     | 0    | 0.479 | 0.479 |
| NFAT5  | REL     | 0 | 0 | 0     | 0     | 0     | 0     | 0    | 0.601 | 0.601 |
| NFAT5  | CREB1   | 0 | 0 | 0     | 0     | 0     | 0     | 0    | 0.569 | 0.569 |
| NFAT5  | TP53    | 0 | 0 | 0     | 0     | 0     | 0     | 0    | 0.402 | 0.402 |
| NFIC   | ZFH3    | 0 | 0 | 0     | 0     | 0     | 0     | 0    | 0.455 | 0.455 |
| NFIC   | POU2F1  | 0 | 0 | 0     | 0     | 0     | 0     | 0    | 0.407 | 0.407 |
| NFKBIZ | CDK6    | 0 | 0 | 0     | 0     | 0     | 0.149 | 0    | 0.425 | 0.49  |
| NFKBIZ | REL     | 0 | 0 | 0     | 0     | 0     | 0.149 | 0    | 0.424 | 0.488 |
| NIN    | BICD1   | 0 | 0 | 0     | 0     | 0.072 | 0.575 | 0    | 0.12  | 0.622 |
| NIN    | PIAS1   | 0 | 0 | 0     | 0     | 0     | 0.576 | 0    | 0     | 0.576 |
| NOVA1  | MYEF2   | 0 | 0 | 0     | 0     | 0     | 0.2   | 0    | 0.704 | 0.753 |
| NR1D2  | ESR1    | 0 | 0 | 0     | 0.632 | 0     | 0     | 0.9  | 0.277 | 0.909 |
| NR1D2  | PPARA   | 0 | 0 | 0     | 0.693 | 0     | 0     | 0.9  | 0.291 | 0.908 |
| NR2C2  | ESR1    | 0 | 0 | 0     | 0.635 | 0     | 0.812 | 0.9  | 0.198 | 0.981 |
| NR2C2  | PPARA   | 0 | 0 | 0     | 0.655 | 0     | 0     | 0.9  | 0.225 | 0.906 |
| NR2C2  | NR1D2   | 0 | 0 | 0     | 0.639 | 0     | 0     | 0.9  | 0.196 | 0.905 |
| NR2C2  | HDAC4   | 0 | 0 | 0     | 0     | 0     | 0.575 | 0    | 0     | 0.575 |
| NRIP1  | ESR1    | 0 | 0 | 0     | 0     | 0     | 0.988 | 0.9  | 0.939 | 0.999 |
| NRIP1  | PPARA   | 0 | 0 | 0     | 0     | 0     | 0.808 | 0.9  | 0.58  | 0.991 |
| NRIP1  | MAPK1   | 0 | 0 | 0     | 0     | 0     | 0     | 0.9  | 0.052 | 0.901 |
| NRIP1  | ZNF217  | 0 | 0 | 0     | 0     | 0     | 0     | 0.36 | 0.482 | 0.654 |
| NRIP1  | PGR     | 0 | 0 | 0     | 0     | 0     | 0     | 0    | 0.566 | 0.566 |
| NRIP1  | GMEB1   | 0 | 0 | 0     | 0     | 0     | 0     | 0    | 0.537 | 0.537 |
| NRIP1  | HDAC4   | 0 | 0 | 0     | 0     | 0     | 0     | 0.36 | 0.138 | 0.424 |
| PAK2   | ITGB1   | 0 | 0 | 0     | 0     | 0.064 | 0     | 0.9  | 0.1   | 0.908 |
| PAK2   | SMAD2   | 0 | 0 | 0     | 0     | 0.079 | 0     | 0    | 0.872 | 0.877 |
| PAK2   | MAPK1   | 0 | 0 | 0.379 | 0.679 | 0     | 0.691 | 0    | 0.389 | 0.758 |
| PAK2   | CDK6    | 0 | 0 | 0.329 | 0.72  | 0     | 0.297 | 0    | 0.372 | 0.418 |
| PAX5   | MYB     | 0 | 0 | 0     | 0     | 0     | 0.576 | 0.9  | 0.902 | 0.995 |
| PAX5   | TP53    | 0 | 0 | 0     | 0     | 0     | 0     | 0    | 0.896 | 0.896 |



|          |         |   |   |      |       |   |       |     |       |       |
|----------|---------|---|---|------|-------|---|-------|-----|-------|-------|
| PAX5     | TCF12   | 0 | 0 | 0    | 0     | 0 | 0     | 0   | 0.836 | 0.836 |
| PAX5     | SOX11   | 0 | 0 | 0    | 0     | 0 | 0     | 0   | 0.834 | 0.834 |
| PAX5     | TCF4    | 0 | 0 | 0    | 0     | 0 | 0     | 0   | 0.652 | 0.653 |
| PAX5     | REL     | 0 | 0 | 0    | 0     | 0 | 0     | 0   | 0.495 | 0.495 |
| PAX5     | CIITA   | 0 | 0 | 0    | 0     | 0 | 0     | 0   | 0.472 | 0.472 |
| PAX7     | MYB     | 0 | 0 | 0    | 0     | 0 | 0     | 0   | 0.821 | 0.821 |
| PAX7     | PTCH1   | 0 | 0 | 0    | 0     | 0 | 0     | 0   | 0.783 | 0.783 |
| PAX7     | SIM1    | 0 | 0 | 0    | 0     | 0 | 0     | 0   | 0.436 | 0.436 |
| PAX7     | PEG3    | 0 | 0 | 0    | 0     | 0 | 0     | 0   | 0.434 | 0.434 |
| PDPK1    | PRKCB   | 0 | 0 | 0    | 0.723 | 0 | 0.717 | 0.9 | 0.662 | 0.975 |
| PDPK1    | RPS6KA6 | 0 | 0 | 0    | 0.727 | 0 | 0.537 | 0.9 | 0.791 | 0.962 |
| PDPK1    | MAPK1   | 0 | 0 | 0    | 0.671 | 0 | 0.11  | 0.9 | 0.393 | 0.918 |
| PDPK1    | TP53    | 0 | 0 | 0    | 0     | 0 | 0     | 0   | 0.5   | 0.499 |
| PEG3     | TP53    | 0 | 0 | 0    | 0     | 0 | 0     | 0   | 0.863 | 0.863 |
| PGR      | ESR1    | 0 | 0 | 0    | 0.711 | 0 | 0.812 | 0.9 | 0.943 | 0.985 |
| PGR      | MAPK1   | 0 | 0 | 0    | 0     | 0 | 0.601 | 0.9 | 0.216 | 0.966 |
| PGR      | PPARA   | 0 | 0 | 0    | 0.63  | 0 | 0     | 0.9 | 0.506 | 0.917 |
| PGR      | NR1D2   | 0 | 0 | 0    | 0.621 | 0 | 0     | 0.9 | 0.144 | 0.904 |
| PGR      | NR2C2   | 0 | 0 | 0    | 0.627 | 0 | 0     | 0.9 | 0.071 | 0.901 |
| PGR      | TP53    | 0 | 0 | 0    | 0     | 0 | 0     | 0   | 0.814 | 0.814 |
| PIAS1    | ESR1    | 0 | 0 | 0    | 0     | 0 | 0.566 | 0   | 0.325 | 0.694 |
| PITX3    | MYB     | 0 | 0 | 0    | 0     | 0 | 0.575 | 0   | 0.738 | 0.884 |
| PITX3    | CDK6    | 0 | 0 | 0    | 0     | 0 | 0.149 | 0   | 0.591 | 0.638 |
| PITX3    | SMAD2   | 0 | 0 | 0    | 0     | 0 | 0     | 0   | 0.418 | 0.418 |
| PLAG1    | PIAS1   | 0 | 0 | 0    | 0     | 0 | 0.585 | 0   | 0.047 | 0.588 |
| POU2F1   | ATF2    | 0 | 0 | 0    | 0     | 0 | 0.109 | 0.9 | 0.159 | 0.918 |
| POU2F1   | ESR1    | 0 | 0 | 0    | 0     | 0 | 0.572 | 0   | 0.264 | 0.671 |
| POU2F1   | PGR     | 0 | 0 | 0    | 0     | 0 | 0.572 | 0   | 0.243 | 0.662 |
| POU2F1   | TEAD1   | 0 | 0 | 0    | 0     | 0 | 0.566 | 0   | 0.14  | 0.61  |
| POU2F1   | SP4     | 0 | 0 | 0    | 0     | 0 | 0.543 | 0   | 0     | 0.543 |
| POU2F1   | ZFH3    | 0 | 0 | 0    | 0     | 0 | 0     | 0   | 0.415 | 0.415 |
| PPARA    | MAPK1   | 0 | 0 | 0    | 0     | 0 | 0.601 | 0.9 | 0.317 | 0.97  |
| PPARA    | ESR1    | 0 | 0 | 0    | 0.65  | 0 | 0     | 0.9 | 0.7   | 0.924 |
| PPARA    | SIRT2   | 0 | 0 | 0    | 0     | 0 | 0     | 0   | 0.406 | 0.406 |
| PPP1R12B | MYH3    | 0 | 0 | 0    | 0     | 0 | 0.109 | 0   | 0.488 | 0.524 |
| PRKAA2   | PPARA   | 0 | 0 | 0    | 0     | 0 | 0     | 0   | 0.859 | 0.859 |
| PRKAA2   | TP53    | 0 | 0 | 0    | 0     | 0 | 0.108 | 0   | 0.834 | 0.846 |
| PRKAA2   | HDAC4   | 0 | 0 | 0    | 0     | 0 | 0.331 | 0   | 0.412 | 0.59  |
| PRKAA2   | MAPK1   | 0 | 0 | 0.23 | 0.657 | 0 | 0.3   | 0   | 0.269 | 0.4   |
| PRKCB    | MAPK1   | 0 | 0 | 0    | 0.641 | 0 | 0.347 | 0.8 | 0.681 | 0.896 |
| PRKCB    | ATF2    | 0 | 0 | 0    | 0     | 0 | 0.149 | 0.8 | 0.128 | 0.838 |
| PRKCB    | ITGB1   | 0 | 0 | 0    | 0     | 0 | 0     | 0.8 | 0.114 | 0.815 |
| PRKCB    | PRKD3   | 0 | 0 | 0    | 0.629 | 0 | 0     | 0.8 | 0.191 | 0.811 |
| PTCH1    | ZNF431  | 0 | 0 | 0    | 0     | 0 | 0.088 | 0   | 0.829 | 0.838 |

|         |         |       |   |   |       |   |   |       |       |       |       |
|---------|---------|-------|---|---|-------|---|---|-------|-------|-------|-------|
| PTCH1   | TP53    | 0     | 0 | 0 | 0     | 0 | 0 | 0     | 0.586 | 0.586 |       |
| PTCH1   | BMPR1A  | 0     | 0 | 0 | 0     | 0 | 0 | 0.169 | 0     | 0.376 | 0.459 |
| PTCH1   | CDK6    | 0     | 0 | 0 | 0     | 0 | 0 | 0.254 | 0     | 0.273 | 0.434 |
| PURA    | CCNT1   | 0     | 0 | 0 | 0     | 0 | 0 | 0.576 | 0     | 0.32  | 0.699 |
| PURA    | EIF2AK2 | 0     | 0 | 0 | 0     | 0 | 0 | 0.461 | 0     | 0.076 | 0.48  |
| RAD50   | DCLK1   | 0     | 0 | 0 | 0     | 0 | 0 | 0.301 | 0     | 0.367 | 0.538 |
| RAD50   | SIRT2   | 0.089 | 0 | 0 | 0     | 0 | 0 | 0.149 | 0     | 0.29  | 0.401 |
| REL     | TP53    | 0     | 0 | 0 | 0     | 0 | 0 | 0     | 0     | 0.929 | 0.93  |
| REL     | ESR1    | 0     | 0 | 0 | 0     | 0 | 0 | 0     | 0     | 0.507 | 0.507 |
| REL     | ATF2    | 0     | 0 | 0 | 0     | 0 | 0 | 0     | 0     | 0.426 | 0.426 |
| REL     | PPARA   | 0     | 0 | 0 | 0     | 0 | 0 | 0     | 0     | 0.415 | 0.414 |
| RFX3    | ATR     | 0     | 0 | 0 | 0     | 0 | 0 | 0.757 | 0     | 0.134 | 0.78  |
| RFX3    | DCLK1   | 0     | 0 | 0 | 0     | 0 | 0 | 0.319 | 0     | 0.545 | 0.677 |
| RFX3    | DTX1    | 0     | 0 | 0 | 0     | 0 | 0 | 0     | 0     | 0.483 | 0.483 |
| RFX3    | MYB     | 0     | 0 | 0 | 0     | 0 | 0 | 0.245 | 0     | 0.33  | 0.473 |
| RFX3    | HDAC4   | 0     | 0 | 0 | 0     | 0 | 0 | 0     | 0     | 0.405 | 0.405 |
| RING1   | PCGF5   | 0     | 0 | 0 | 0     | 0 | 0 | 0.334 | 0     | 0.46  | 0.625 |
| RNF41   | ANKRD52 | 0     | 0 | 0 | 0     | 0 | 0 | 0     | 0     | 0.434 | 0.434 |
| RPS6KA3 | MAPK1   | 0     | 0 | 0 | 0.697 | 0 | 0 | 0.995 | 0.9   | 0.703 | 0.999 |
| RPS6KA3 | PDPK1   | 0     | 0 | 0 | 0.73  | 0 | 0 | 0.936 | 0.9   | 0.974 | 0.995 |
| RPS6KA3 | RPS6KA6 | 0     | 0 | 0 | 0.983 | 0 | 0 | 0     | 0.9   | 0.564 | 0.9   |
| RPS6KA3 | ESR1    | 0     | 0 | 0 | 0     | 0 | 0 | 0.807 | 0     | 0.419 | 0.883 |
| RPS6KA3 | MYB     | 0     | 0 | 0 | 0     | 0 | 0 | 0     | 0     | 0.589 | 0.59  |
| RPS6KA3 | TP53    | 0     | 0 | 0 | 0     | 0 | 0 | 0     | 0     | 0.509 | 0.509 |
| RPS6KA3 | LPP     | 0     | 0 | 0 | 0     | 0 | 0 | 0     | 0     | 0.489 | 0.49  |
| RPS6KA3 | ATF2    | 0     | 0 | 0 | 0     | 0 | 0 | 0.149 | 0     | 0.335 | 0.41  |
| RPS6KA6 | MAPK1   | 0     | 0 | 0 | 0.699 | 0 | 0 | 0.27  | 0.9   | 0.569 | 0.936 |
| RUNX1T1 | CBFA2T2 | 0     | 0 | 0 | 0.968 | 0 | 0 | 0.944 | 0     | 0.949 | 0.945 |
| RUNX1T1 | TCF12   | 0     | 0 | 0 | 0     | 0 | 0 | 0.574 | 0     | 0.181 | 0.636 |
| RUNX1T1 | TCF4    | 0     | 0 | 0 | 0     | 0 | 0 | 0.574 | 0     | 0.127 | 0.612 |
| RUNX1T1 | GMEB1   | 0     | 0 | 0 | 0     | 0 | 0 | 0     | 0     | 0.486 | 0.485 |
| RUNX2   | SMAD4   | 0     | 0 | 0 | 0     | 0 | 0 | 0     | 0.9   | 0.909 | 0.99  |
| RUNX2   | SMAD2   | 0     | 0 | 0 | 0     | 0 | 0 | 0.575 | 0     | 0.957 | 0.981 |
| RUNX2   | HDAC4   | 0     | 0 | 0 | 0     | 0 | 0 | 0.92  | 0     | 0.474 | 0.956 |
| RUNX2   | MAPK1   | 0     | 0 | 0 | 0     | 0 | 0 | 0     | 0.9   | 0.182 | 0.914 |
| RUNX2   | ATF6    | 0     | 0 | 0 | 0     | 0 | 0 | 0     | 0     | 0.822 | 0.822 |
| RUNX2   | ZNF354C | 0     | 0 | 0 | 0     | 0 | 0 | 0     | 0     | 0.8   | 0.8   |
| RUNX2   | TP53    | 0     | 0 | 0 | 0     | 0 | 0 | 0.576 | 0     | 0.507 | 0.782 |
| RUNX2   | BMPR1A  | 0     | 0 | 0 | 0     | 0 | 0 | 0.569 | 0     | 0.423 | 0.741 |
| RUNX2   | PPARA   | 0     | 0 | 0 | 0     | 0 | 0 | 0.08  | 0     | 0.587 | 0.603 |
| RUNX2   | SOX6    | 0     | 0 | 0 | 0     | 0 | 0 | 0     | 0     | 0.589 | 0.589 |
| RUNX2   | ESR1    | 0     | 0 | 0 | 0     | 0 | 0 | 0.08  | 0     | 0.507 | 0.527 |
| RUNX2   | PAX5    | 0     | 0 | 0 | 0     | 0 | 0 | 0.301 | 0     | 0.313 | 0.499 |
| RUNX2   | ITGB1   | 0     | 0 | 0 | 0     | 0 | 0 | 0     | 0     | 0.466 | 0.465 |

|         |         |   |   |       |       |       |       |       |     |       |       |
|---------|---------|---|---|-------|-------|-------|-------|-------|-----|-------|-------|
| RUNX2   | PTCH1   | 0 | 0 | 0     | 0     | 0     | 0     | 0     | 0   | 0.457 | 0.457 |
| RYBP    | RING1   | 0 | 0 | 0     | 0     | 0     | 0     | 0.643 | 0   | 0.875 | 0.953 |
| RYBP    | TP53    | 0 | 0 | 0     | 0     | 0     | 0     | 0.566 | 0   | 0.165 | 0.622 |
| RYBP    | MDM2    | 0 | 0 | 0     | 0     | 0     | 0     | 0.566 | 0   | 0.052 | 0.57  |
| RYBP    | PCGF5   | 0 | 0 | 0     | 0     | 0     | 0     | 0.302 | 0   | 0.223 | 0.434 |
| SCAI    | ITGB1   | 0 | 0 | 0     | 0     | 0     | 0     | 0     | 0.9 | 0.07  | 0.903 |
| SIM1    | VSX2    | 0 | 0 | 0     | 0     | 0     | 0     | 0     | 0   | 0.447 | 0.447 |
| SKOR1   | SMAD4   | 0 | 0 | 0     | 0     | 0     | 0     | 0     | 0   | 0.716 | 0.716 |
| SKOR1   | SMAD2   | 0 | 0 | 0     | 0     | 0     | 0     | 0     | 0   | 0.501 | 0.502 |
| SMAD2   | MAPK1   | 0 | 0 | 0     | 0     | 0     | 0     | 0.576 | 0.9 | 0.653 | 0.984 |
| SMAD2   | BMPR1A  | 0 | 0 | 0     | 0     | 0     | 0     | 0.248 | 0.8 | 0.868 | 0.978 |
| SMAD2   | ESR1    | 0 | 0 | 0     | 0     | 0     | 0     | 0.804 | 0   | 0.416 | 0.88  |
| SMAD2   | ZNF8    | 0 | 0 | 0     | 0     | 0     | 0     | 0.566 | 0   | 0.067 | 0.577 |
| SMAD4   | SMAD2   | 0 | 0 | 0     | 0.75  | 0     | 0     | 0.999 | 0.9 | 0.995 | 0.999 |
| SMAD4   | ATF2    | 0 | 0 | 0     | 0     | 0     | 0     | 0.576 | 0.9 | 0.878 | 0.994 |
| SMAD4   | BMPR1A  | 0 | 0 | 0     | 0     | 0     | 0     | 0.341 | 0.9 | 0.871 | 0.99  |
| SMAD4   | ESR1    | 0 | 0 | 0     | 0     | 0     | 0     | 0.567 | 0.9 | 0.474 | 0.975 |
| SMAD4   | MAPK1   | 0 | 0 | 0     | 0     | 0     | 0     | 0.576 | 0.8 | 0.49  | 0.953 |
| SMAD4   | TP53    | 0 | 0 | 0     | 0     | 0     | 0     | 0     | 0   | 0.943 | 0.943 |
| SMAD4   | PIAS1   | 0 | 0 | 0     | 0     | 0     | 0     | 0.686 | 0   | 0.797 | 0.934 |
| SMAD4   | PPARA   | 0 | 0 | 0     | 0     | 0     | 0     | 0     | 0   | 0.863 | 0.863 |
| SMAD4   | ZNF8    | 0 | 0 | 0     | 0     | 0     | 0     | 0.566 | 0   | 0.064 | 0.576 |
| SMAD4   | CDK6    | 0 | 0 | 0     | 0     | 0     | 0     | 0     | 0   | 0.412 | 0.412 |
| STK17B  | MAPK1   | 0 | 0 | 0.206 | 0.663 | 0     | 0     | 0.25  | 0   | 0.489 | 0.404 |
| STK24   | TEAD1   | 0 | 0 | 0     | 0     | 0     | 0     | 0     | 0   | 0.474 | 0.474 |
| STK24   | MEGF10  | 0 | 0 | 0     | 0     | 0.41  | 0     | 0     | 0   | 0     | 0.41  |
| STK32A  | PDPK1   | 0 | 0 | 0.272 | 0.744 | 0     | 0     | 0.453 | 0   | 0.669 | 0.572 |
| STK32A  | MAPK1   | 0 | 0 | 0.256 | 0.661 | 0.07  | 0     | 0.27  | 0   | 0.357 | 0.418 |
| SYNCRIP | A1CF    | 0 | 0 | 0     | 0.854 | 0     | 0     | 0.812 | 0   | 0.524 | 0.826 |
| SYNCRIP | TP53    | 0 | 0 | 0     | 0     | 0     | 0     | 0     | 0   | 0.824 | 0.824 |
| SYNCRIP | HNRNPA0 | 0 | 0 | 0     | 0.651 | 0     | 0     | 0.57  | 0   | 0.25  | 0.602 |
| TCF12   | SMAD2   | 0 | 0 | 0     | 0     | 0     | 0     | 0.569 | 0   | 0.067 | 0.58  |
| TEAD1   | PPARA   | 0 | 0 | 0     | 0     | 0     | 0     | 0     | 0.9 | 0.058 | 0.901 |
| TEAD1   | MAPK1   | 0 | 0 | 0     | 0     | 0     | 0     | 0.299 | 0   | 0.588 | 0.698 |
| TEAD1   | MAP3K2  | 0 | 0 | 0     | 0     | 0     | 0     | 0.149 | 0   | 0.424 | 0.488 |
| TFDP2   | SMAD4   | 0 | 0 | 0     | 0     | 0     | 0     | 0     | 0.9 | 0.218 | 0.918 |
| TFDP2   | BRCA1   | 0 | 0 | 0     | 0     | 0     | 0     | 0     | 0.9 | 0.063 | 0.902 |
| TFDP2   | SMAD2   | 0 | 0 | 0     | 0     | 0     | 0     | 0     | 0.9 | 0.047 | 0.9   |
| TFDP2   | RYBP    | 0 | 0 | 0     | 0     | 0     | 0     | 0     | 0.9 | 0     | 0.9   |
| TFDP2   | CBX5    | 0 | 0 | 0     | 0     | 0     | 0     | 0     | 0.9 | 0.045 | 0.9   |
| TFDP2   | CDK6    | 0 | 0 | 0     | 0     | 0.064 | 0     | 0.102 | 0   | 0.519 | 0.56  |
| TFDP2   | MYNN    | 0 | 0 | 0     | 0     | 0     | 0     | 0     | 0   | 0.424 | 0.424 |
| TFDP2   | MYB     | 0 | 0 | 0     | 0     | 0     | 0.097 | 0.269 | 0   | 0.181 | 0.412 |
| TMF1    | ANKAR   | 0 | 0 | 0     | 0     | 0     | 0     | 0     | 0   | 0.86  | 0.86  |

|         |         |       |   |   |       |       |       |     |       |       |
|---------|---------|-------|---|---|-------|-------|-------|-----|-------|-------|
| TNKS    | LNPEP   | 0     | 0 | 0 | 0     | 0     | 0.803 | 0   | 0.311 | 0.858 |
| TP53    | PIAS1   | 0     | 0 | 0 | 0     | 0     | 0.998 | 0   | 0.458 | 0.999 |
| TP53    | MAPK1   | 0     | 0 | 0 | 0     | 0     | 0.988 | 0.8 | 0.508 | 0.998 |
| TP53    | SMAD2   | 0     | 0 | 0 | 0     | 0     | 0.987 | 0   | 0.912 | 0.998 |
| TP53    | EIF2AK2 | 0     | 0 | 0 | 0     | 0     | 0.808 | 0.9 | 0.825 | 0.996 |
| TP53    | ESR1    | 0     | 0 | 0 | 0     | 0     | 0.812 | 0   | 0.856 | 0.971 |
| TP53    | RAD50   | 0     | 0 | 0 | 0     | 0     | 0     | 0.9 | 0.666 | 0.965 |
| TP53    | SIRT2   | 0     | 0 | 0 | 0     | 0     | 0.276 | 0   | 0.912 | 0.934 |
| TP53    | CDK6    | 0     | 0 | 0 | 0     | 0     | 0     | 0   | 0.894 | 0.894 |
| TP53    | PPARA   | 0     | 0 | 0 | 0     | 0     | 0     | 0   | 0.606 | 0.606 |
| TP53    | HDAC4   | 0     | 0 | 0 | 0     | 0     | 0.233 | 0   | 0.415 | 0.532 |
| TP53    | ATF2    | 0     | 0 | 0 | 0     | 0     | 0     | 0   | 0.472 | 0.472 |
| TRIM24  | ESR1    | 0     | 0 | 0 | 0     | 0     | 0.997 | 0   | 0.408 | 0.998 |
| TRIM24  | TP53    | 0     | 0 | 0 | 0     | 0     | 0.912 | 0   | 0.31  | 0.936 |
| TRIM24  | CBX5    | 0     | 0 | 0 | 0     | 0     | 0.805 | 0   | 0.325 | 0.863 |
| TRIM24  | PGR     | 0     | 0 | 0 | 0     | 0     | 0.573 | 0   | 0.266 | 0.673 |
| TRIM24  | NRIP1   | 0     | 0 | 0 | 0     | 0     | 0     | 0   | 0.581 | 0.581 |
| TRIM24  | MYB     | 0     | 0 | 0 | 0     | 0     | 0.225 | 0   | 0.37  | 0.491 |
| TRPS1   | RUNX2   | 0     | 0 | 0 | 0     | 0     | 0     | 0   | 0.877 | 0.878 |
| VGLL3   | TEAD1   | 0     | 0 | 0 | 0     | 0     | 0     | 0   | 0.86  | 0.86  |
| VGLL3   | KDM5B   | 0     | 0 | 0 | 0     | 0     | 0.443 | 0   | 0     | 0.443 |
| WDR12   | RBM28   | 0     | 0 | 0 | 0     | 0.825 | 0.945 | 0   | 0.161 | 0.991 |
| WHSC1   | HDAC4   | 0.063 | 0 | 0 | 0     | 0     | 0.22  | 0   | 0.288 | 0.434 |
| WHSC1   | KDM5B   | 0     | 0 | 0 | 0     | 0     | 0.201 | 0   | 0.302 | 0.418 |
| WHSC1   | IRF4    | 0     | 0 | 0 | 0     | 0     | 0     | 0   | 0.405 | 0.405 |
| YAF2    | RING1   | 0     | 0 | 0 | 0     | 0     | 0.105 | 0   | 0.774 | 0.789 |
| YAF2    | PCGF5   | 0     | 0 | 0 | 0     | 0     | 0.302 | 0   | 0.38  | 0.548 |
| ZC3H14  | DAZAP1  | 0     | 0 | 0 | 0     | 0     | 0.722 | 0   | 0     | 0.722 |
| ZC3H6   | ZNF292  | 0     | 0 | 0 | 0     | 0     | 0     | 0   | 0.718 | 0.718 |
| ZC3H6   | DAZAP1  | 0     | 0 | 0 | 0     | 0     | 0.383 | 0   | 0.378 | 0.599 |
| ZDHHC17 | ZNF333  | 0     | 0 | 0 | 0     | 0.079 | 0.374 | 0   | 0.072 | 0.418 |
| ZDHHC17 | TULP4   | 0     | 0 | 0 | 0     | 0     | 0     | 0   | 0.418 | 0.418 |
| ZEB1    | SMAD4   | 0     | 0 | 0 | 0     | 0     | 0     | 0   | 0.896 | 0.896 |
| ZEB1    | MYB     | 0     | 0 | 0 | 0     | 0     | 0     | 0   | 0.876 | 0.876 |
| ZEB1    | SMAD2   | 0     | 0 | 0 | 0     | 0     | 0.576 | 0   | 0.535 | 0.794 |
| ZEB1    | ZFH3    | 0     | 0 | 0 | 0     | 0     | 0     | 0   | 0.624 | 0.624 |
| ZEB1    | TP53    | 0     | 0 | 0 | 0     | 0     | 0     | 0   | 0.568 | 0.568 |
| ZEB1    | CDK6    | 0     | 0 | 0 | 0     | 0     | 0.292 | 0   | 0.31  | 0.49  |
| ZEB1    | ESR1    | 0     | 0 | 0 | 0     | 0     | 0     | 0   | 0.469 | 0.469 |
| ZFP37   | ELK4    | 0     | 0 | 0 | 0     | 0     | 0     | 0   | 0.412 | 0.412 |
| ZFPM2   | LHX9    | 0     | 0 | 0 | 0     | 0     | 0     | 0   | 0.553 | 0.553 |
| ZHX3    | ZHX1    | 0     | 0 | 0 | 0.854 | 0     | 0.809 | 0   | 0.862 | 0.833 |
| ZMYM2   | CUX1    | 0     | 0 | 0 | 0     | 0     | 0     | 0.9 | 0.175 | 0.913 |
| ZMYM2   | ZNF280D | 0     | 0 | 0 | 0     | 0     | 0.226 | 0   | 0.758 | 0.805 |

---

|        |        |   |   |   |   |   |   |       |      |       |       |
|--------|--------|---|---|---|---|---|---|-------|------|-------|-------|
| ZMYM2  | AFF4   | 0 | 0 | 0 | 0 | 0 | 0 | 0     | 0    | 0.68  | 0.68  |
| ZMYM2  | ZNF292 | 0 | 0 | 0 | 0 | 0 | 0 | 0     | 0    | 0.444 | 0.444 |
| ZNF131 | ESR1   | 0 | 0 | 0 | 0 | 0 | 0 | 0.59  | 0    | 0.13  | 0.628 |
| ZNF148 | TP53   | 0 | 0 | 0 | 0 | 0 | 0 | 0.576 | 0    | 0.855 | 0.936 |
| ZNF148 | HDAC4  | 0 | 0 | 0 | 0 | 0 | 0 | 0.604 | 0    | 0.26  | 0.694 |
| ZNF217 | HDAC4  | 0 | 0 | 0 | 0 | 0 | 0 | 0.105 | 0.72 | 0.199 | 0.781 |
| ZNF217 | CBX5   | 0 | 0 | 0 | 0 | 0 | 0 | 0     | 0.54 | 0     | 0.54  |
| ZNF461 | HDAC2  | 0 | 0 | 0 | 0 | 0 | 0 | 0.623 | 0    | 0.427 | 0.775 |

---
